# Supplementary material
Source: Springer Nature journal article supplement (https://www.springermedizin.de/resource/supplementary/12936_2012_2178_MOESM3_ESM.pdf/9542954)

### a) Complete 42-day follow-up group

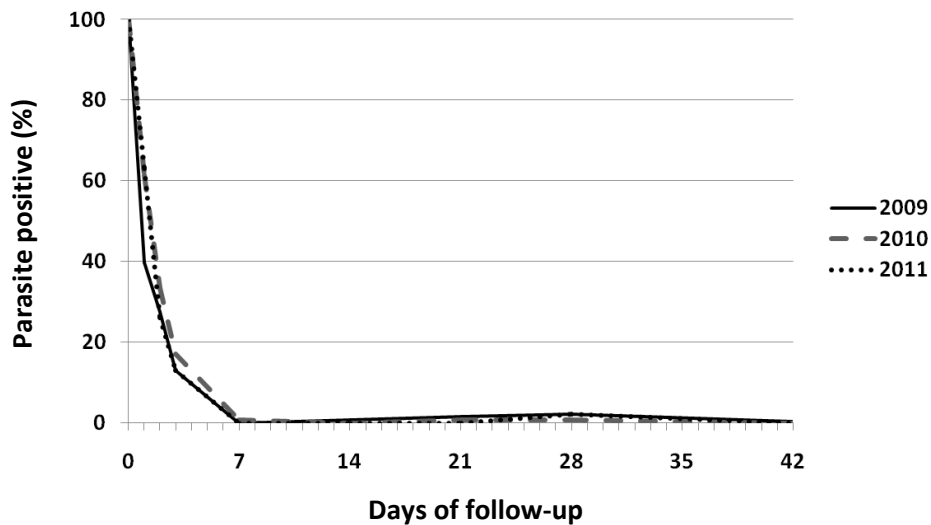

### b) At least one follow-up group

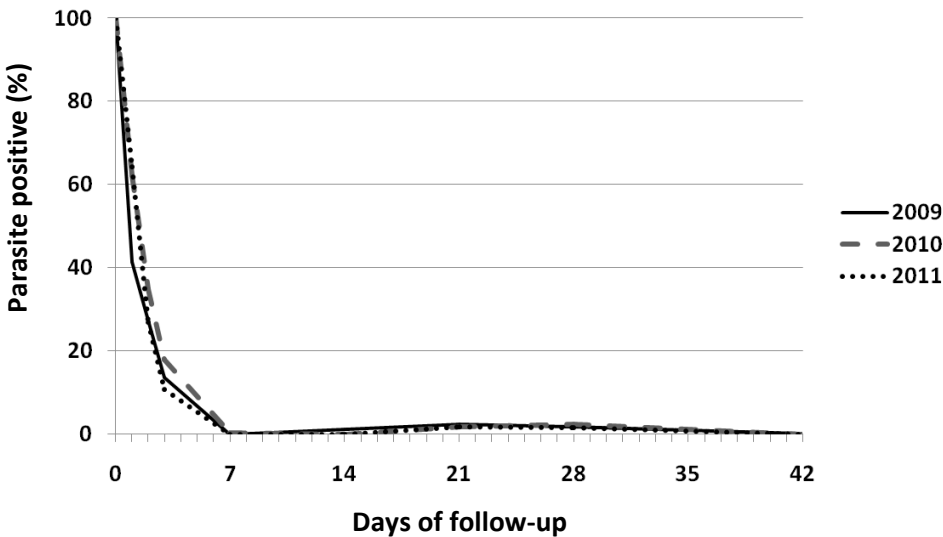

Supplement: MOESM3 [file 9542954]
